# Mat-aCGH: a Matlab toolbox for simultaneous multisample aCGH data analysis and visualization

Majid Mohammadi<sup>a</sup>, Hossein Sharifi Noghabi<sup>b,c</sup>

<sup>a</sup>*Faculty of Technology, Policy and Management, Delft University of Technology, Netherlands*

<sup>b</sup>*Department of Computer Engineering, Faculty of Engineering, Ferdowsi University of Mashhad, Mashhad, Iran*

<sup>c</sup>*Center of Excellence on Soft Computing and Intelligent Information Processing (SCIIP)*

---

## Abstract

Mat-aCGH is an application toolbox for analysis and visualization of microarray-comparative genomic hybridization (array-CGH or aCGH) data which is based on Matlab. Full process of aCGH analysis, from denoising of the raw data to the visualization of the desired results, can be obtained via Mat-aCGH straightforwardly. The main advantage of this toolbox is that it is collection of recent well-known statistical and information theoretic methods and algorithms for analyzing aCGH data. More importantly, the proposed toolbox is developed for multisample analysis which is one of the current challenges in this area. Mat-aCGH is convenient to apply for any format of data, robust against diverse noise and provides the users with valuable information in the form of diagrams and metrics. Therefore, it eliminates the needs of another software or package for multisample aCGH analysis. aCGH Matlab source codes and datasets are freely available and can be downloaded at:

*[hsharifi.student.um.ac.ir/imagesm/14407/Mat-aCGH.rar](http://hsharifi.student.um.ac.ir/imagesm/14407/Mat-aCGH.rar).*

**Keywords:** Cancer, CNV, aCGH, half quadratic, Correntropy

---

## 1. Introduction

We are in the post-genome era which means urgent need for computational methods for analyzing high-throughput genomics data in order to extract biological knowledge out of them (Zhou et al. 14). High-throughput technologies such as Next Generation Sequencing (NGS) [5] have paved the way for scientists to understand complex diseases in much better ways. One of these novel technologies is accentuation of comparative genomic hybridization (CGH) and microarray in arrayCGH (aCGH) [8]. aCGH is a high-throughput and high-resolution approach for measuring changes of copy numbers in thousands of DNA regions [6].

Investigation of DNA copy number aberrations in different diseases such as cancer has been truly enhanced via aCGH [7]. The primary goal of analyzing aCGH data is to identify the sections of copy number variation (CNV) and moreover, quantifying their amount at thousands of locations in a genome [11]. Although lots of studies have performed so far on aCGH analysis, most of them were based on single-sample [6]. Today, the focus of aCGH research is on multi-sample analysis [10], therefore, it is vital and crucial to provide researchers with a reliable toolbox in this regard. Previous attempts such as ArrayCyGHt [2] or CGHAnalyzer [3] provides the users with effective techniques, however, it is essential to propose novel toolboxes that take advantage of more recent methods with especial focus on robust denoising capabilities and multi-sample analysis.

## 2. Streamlined Steps

### 2.1. Loading Data

The methods provided in this toolbox can analyze any data loadable in Matlab. Aside from that, simulated data can be generated with adjustable number of dimensions and samples. To better distinguish the performance of various methods, the possibility to contaminate the simulated data is considered and various types

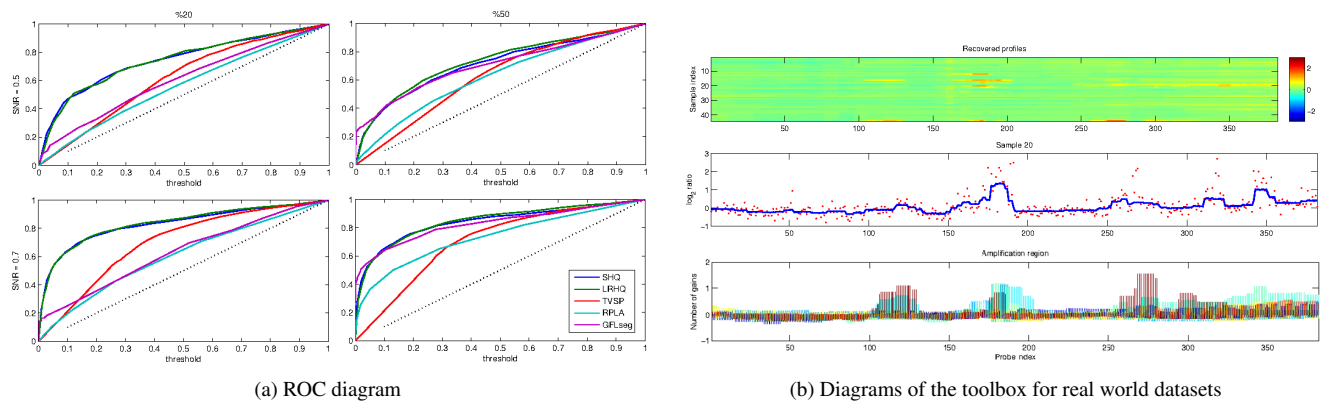

Figure 1: Toolbox visualization diagrams: (a) ROC diagram on simulated data contaminated with Exponential noise and different SNRs and shared percentage; (b) Bar and heat diagrams of Pollack et al. dataset [9] and one of its real and recovered samples; Red dots: real profile; Blue line: recovered profile

of noise are accommodated in this toolbox. Further, two types of aberrations are considered: the aberrations for each individual profile and aberrations shared among all profiles. The ratio between shared aberrations and all aberrations is called *shared percentage* (Zhou et al. 12). It is worth mentioning that any individual aCGH sample lies on the columns of the data matrix.

## 2.2. Analysis

After loading CGH array data or generating simulated profiles, there are five methods by which real or simulated data can be analyzed: TVSp (Zhou et al. 12), RPLA (Zhou et al. 13), Group Fused Lasso segmentation (GFLseg) (Bleakley and Vert 1), SHQ and LRHQ (Mohammadi and Abed Hodsani 4). TVSp approximated the whole aCGH profiles by minimizing nuclear norm of the whole matrix and the total variation of each sample. With the same approach, RPLA tried to recover true aCGH data by imposing a sparse error assumption on each sample. This method is claimed to be more robust in dealing with diverse noise. In contrast to TVSp and RPLA, GFLseg denoised aCGH data by minimizing the total variation of the entire matrix. In order to deal with different types of noise (especially non-Gaussian noise), SHQ and LRHQ accommodated different M-estimation loss functions. SHQ encouraged the approximated aCGH profiles to be as sparse and piecewise constant as possible and LRHQ proposed to recover a low rank and piecewise constant aCGH data matrix.

## 2.3. Visualization

In order to visualize this toolbox, we provide the users with numerous informative plots and diagrams. In the case of the real example profiles, plots including: heat diagram, bar diagram, real (noisy) and recovered signals are provided. In addition to these plots and diagrams, different metrics such as receiver operating characteristic (ROC), accuracy and false discovery rate (FDR) are also included in Mat-aCGH. It is important to note that the latter metrics are only applicable for simulated examples and inputs. Fig. 1 illustrates aforementioned visualization for both simulated and real data. Fig. 1 (a) shows the ROC on a generated data with exponential noise. The different SNRs and shared percentage are considered and the results of recovered profiles are shown. Fig. 1 (b) dedicated to diagrams for Pollack dataset [9]. The first row plots heat diagram, the second row shows an individual sample of dataset before and after processing by LRHQ and the last row illustrates the bar diagram of the mentioned dataset.

## 3. Conclusion

Although the provided toolbox is not covering all of the state-of-the-art methods and algorithms, it tried to make the best use of the best methods and deals with aCGH data analysis from different aspects and prospective. This Matlab-based toolbox can play a pivotal role in aCGH profiles denoising, analysis and visualization. To our knowledge, this is the first multisample aCGH toolbox that brought most recent

methods and algorithms from information theoretic learning (ITL) to statistical learning. Mat-aCGH is completely user-friendly and any users with basic understanding of Matlab can apply it for wide range of data types readable in Matlab. In this version of Mat-aCGH, the users can load simulated and real examples provided by the authors or load their own dataset and compare the results with all of the methods implemented in this toolbox at the same time. For future, we are planning to develop Mat-aCGH in C and R and provide the users with graphical user interface.

#### 4. References

- [1] Kevin Bleakley and Jean-Philippe Vert. The group fused lasso for multiple change-point detection. *arXiv preprint arXiv:1106.4199*, 2011.
- [2] Su Young Kim, Suk Woo Nam, Sug Hyung Lee, Won Sang Park, Nam Jin Yoo, Jung Young Lee, and Yeun-Jun Chung. Arraycyght: a web application for analysis and visualization of array-cgh data. *Bioinformatics*, 21(10):2554–2555, 2005.
- [3] Adam A Margolin, Joel Greshock, Tara L Naylor, Yael Mosse, John M Maris, Graham Bignell, Alexander I Saeed, John Quackenbush, and Barbara L Weber. Cghalyzer: a stand-alone software package for cancer genome analysis using array-based dna copy number data. *Bioinformatics*, 21(15):3308–3311, 2005.
- [4] Majid Mohammadi and Ghosheh Abed Hodtani. A robust acgh data recovery framework based on half-quadratic minimization. *Submitted to Computers in Biology and Medicine*, 2015.
- [5] Olena Morozova and Marco A Marra. Applications of next-generation sequencing technologies in functional genomics. *Genomics*, 92(5):255–264, 2008.
- [6] Gen Nowak, Trevor Hastie, Jonathan R Pollack, and Robert Tibshirani. A fused lasso latent feature model for analyzing multi-sample acgh data. *Biostatistics*, page kxr012, 2011.
- [7] Daniel Pinkel and Donna G Albertson. Array comparative genomic hybridization and its applications in cancer. *Nature genetics*, 37:S11–S17, 2005.
- [8] Daniel Pinkel, Richard Segraves, Damir Sudar, Steven Clark, Ian Poole, David Kowbel, Colin Collins, Wen-Lin Kuo, Chira Chen, Ye Zhai, et al. High resolution analysis of dna copy number variation using comparative genomic hybridization to microarrays. *Nature genetics*, 20(2):207–211, 1998.
- [9] Jonathan R Pollack, Therese Sørlie, Charles M Perou, Christian A Rees, Stefanie S Jeffrey, Per E Lonning, Robert Tibshirani, David Botstein, Anne-Lise Børresen-Dale, and Patrick O Brown. Microarray analysis reveals a major direct role of dna copy number alteration in the transcriptional program of human breast tumors. *Proceedings of the National Academy of Sciences*, 99(20):12963–12968, 2002.
- [10] Ze Tian and Rui Kuang. Integrative classification and analysis of multiple arraycgh datasets with probe alignment. *Bioinformatics*, 26(18):2313–2320, 2010. doi: 10.1093/bioinformatics/btq428.
- [11] Feifei Xiao, Xiaoyi Min, and Heping Zhang. Modified screening and ranking algorithm for copy number variation detection. *Bioinformatics*, 31(9):1341–1348, 2015. doi: 10.1093/bioinformatics/btu850.
- [12] Xiaowei Zhou, Can Yang, Xiang Wan, Hongyu Zhao, and Weichuan Yu. Multisample acgh data analysis via total variation and spectral regularization. *Computational Biology and Bioinformatics, IEEE/ACM Transactions on*, 10(1):230–235, 2013.
- [13] Xiaowei Zhou, Jiming Liu, Xiang Wan, and Weichuan Yu. Piecewise-constant and low-rank approximation for identification of recurrent copy number variations. *Bioinformatics*, page btu131, 2014.
- [14] Xiaowei Zhou, Jiming Liu, Xiang Wan, and Weichuan Yu. Piecewise-constant and low-rank approximation for identification of recurrent copy number variations. *Bioinformatics*, 30(14):1943–1949, 2014. doi: 10.1093/bioinformatics/btu131.
